# Supplementary material for: Matrix effects of carbon and bromine in inductively coupled plasma optical emission spectrometry
Source: Royal Society of Chemistry journal article supplement (doi:10.1039/c5ja00237k), 2015-01-01
Supplement: c5ja00237k1.pdf [file c5ja00237k1.pdf]

## Supplementary Material

Signal enhancement / suppression factors (emission line signal obtained in the given reagent divided by the signal obtained in 3% v/v HNO<sub>3</sub>) by various reagents and circuit schematics of the analog to digital converter used to tap the control lines of the RF generator's high voltage power supply. The firmware of the microcontroller (ATSAM3X8E on an "Arduino Due - open source electronics prototyping platform"; [www.arduino.cc](http://www.arduino.cc)) is available from the author upon request.

ESM Table 1 Signal enhancement / suppression factors emission line signal obtained in the given reagent divided by the signal obtained in 3% v/v HNO<sub>3</sub> by various reagents. ND: not determined; LR: line rejected - spectral interference defined as blank signal > 10% of the signal in the analyte containing solution before blank subtraction; RSD < 3 % for all emission lines

| Emission line, nm | Total Line Energy, eV | Methanol | Phenyl-alanine | CO <sub>2</sub> added to the aerosol gas stream | CO <sub>2</sub> added to the intermediate gas flow | Br <sub>2</sub> | NaCl |
|-------------------|-----------------------|----------|----------------|-------------------------------------------------|----------------------------------------------------|-----------------|------|
|                   | 10 %                  | 8 g/L C  | 15 sccm        | 15 sccm                                         | 34 g/L                                             | 30 g/L          |      |
| Ag II 224.641     | 17.95                 | 1.68     | 1.01           | ND                                              | ND                                                 | ND              | ND   |
| Ag I 328.068      | 3.78                  | 1.03     | 0.99           | ND                                              | ND                                                 | ND              | ND   |
| Ag I 338.289      | 3.66                  | 1.02     | 0.99           | ND                                              | ND                                                 | ND              | ND   |
| Al II 167.078     | 13.41                 | 1.50     | 1.02           | 1.04                                            | 1.83                                               | 0.95            | 0.69 |
| Al I 308.215      | 4.02                  | 1.09     | 0.98           | LR                                              | LR                                                 | LR              | LR   |
| Al I 394.401      | 3.14                  | 1.01     | 0.98           | 0.76                                            | 1.28                                               | 1.07            | 0.79 |
| Al I 396.152      | 3.14                  | 1.00     | 0.98           | 0.76                                            | 1.27                                               | 1.06            | 0.79 |
| Ar I 404.442      | 14.69                 | 1.97     | 0.98           | 1.36                                            | 2.49                                               | 0.88            | 0.90 |
| Ar I 430.01       | 14.51                 | 1.94     | 0.98           | 1.34                                            | 2.40                                               | 0.88            | 0.91 |
| As I 189.042      | 6.56                  | 1.97     | 1.08           | 1.52                                            | 2.08                                               | 1.04            | 0.83 |
| As I 193.759      | 6.40                  | 1.90     | 1.07           | 1.48                                            | 2.01                                               | 1.04            | 0.84 |
| As I 197.262      | 6.29                  | 1.92     | 1.08           | 1.47                                            | 1.98                                               | 1.03            | 0.84 |
| Au II 174.05      | 18.22                 | LR       | 0.99           | LR                                              | LR                                                 | LR              | LR   |
| Au I 201.2        | 7.30                  | 1.35     | 1.00           | LR                                              | 1.47                                               | 1.06            | 0.80 |
| Au I 242.795      | 5.11                  | 1.18     | 1.00           | 0.92                                            | 1.25                                               | 1.03            | 0.81 |
| Au I 267.595      | 4.63                  | 1.09     | 1.00           | 0.89                                            | 1.17                                               | 1.02            | 0.82 |
| B II 136.246      | 17.40                 | LR       | 1.05           | ND                                              | ND                                                 | ND              | ND   |
| B I 182.641       | 6.79                  | LR       | 1.01           | ND                                              | ND                                                 | ND              | ND   |
| B I 208.959       | 5.93                  | LR       | 1.00           | ND                                              | ND                                                 | ND              | ND   |
| B I 249.677       | 4.96                  | 1.16     | 0.98           | 0.95                                            | 1.25                                               | 1.01            | 0.76 |
| B I 249.773       | 4.96                  | 1.16     | 0.97           | 0.94                                            | 1.26                                               | 1.01            | 0.76 |
| Ba II 230.424     | 11.19                 | 1.10     | 1.01           | ND                                              | ND                                                 | ND              | ND   |
| Ba II 233.527     | 11.22                 | 1.08     | 1.02           | ND                                              | ND                                                 | ND              | ND   |
| Ba II 455.404     | 7.93                  | 0.84     | 1.02           | ND                                              | ND                                                 | ND              | ND   |
| Be I 234.861      | 5.28                  | 1.18     | 0.99           | 0.93                                            | 1.28                                               | 0.96            | 0.75 |
| Be II 313.042     | 13.28                 | 1.42     | 1.08           | 1.07                                            | 1.40                                               | 1.05            | 0.66 |
| Be II 313.107     | 13.28                 | 1.42     | 1.08           | 1.07                                            | 1.41                                               | 1.05            | 0.66 |
| Bi II 190.241     | 15.91                 | LR       | 0.99           | LR                                              | 1.43                                               | 0.87            | 0.68 |
| Bi I 222.825      | 5.56                  | 1.09     | 0.98           | 0.80                                            | 1.20                                               | 0.92            | 0.74 |
| Bi I 223.061      | 5.56                  | 1.03     | 0.97           | 0.78                                            | 1.18                                               | 0.94            | 0.74 |
| Br I 144.99       | 8.55                  | LR       | 0.98           | LR                                              | 1.73                                               | ND              | ND   |
| Br I 148.845      | 8.33                  | 1.57     | 0.98           | LR                                              | 1.59                                               | ND              | ND   |
| Br I 154.065      | 8.05                  | 1.58     | 0.98           | LR                                              | LR                                                 | ND              | ND   |
| Ca II 183.801     | 14.55                 | LR       | 1.04           | LR                                              | LR                                                 | LR              | LR   |
| Ca II 315.887     | 13.16                 | 1.24     | 1.03           | 0.86                                            | 1.44                                               | 1.00            | 0.66 |
| Ca II 317.933     | 13.16                 | 1.22     | 1.03           | 0.87                                            | 1.44                                               | 0.99            | 0.66 |
| Ca II 393.366     | 9.26                  | 0.90     | 1.04           | 0.69                                            | 0.99                                               | 0.97            | 0.65 |

| Emission line, nm | Total Line Energy, eV | Methanol | Phenylalanine | CO <sub>2</sub> added to the aerosol gas stream | CO <sub>2</sub> added to the intermediate gas flow | Br <sub>2</sub> | NaCl   |
|-------------------|-----------------------|----------|---------------|-------------------------------------------------|----------------------------------------------------|-----------------|--------|
|                   |                       | 10 %     | 8 g/L C       | 15 sccm                                         | 15 sccm                                            | 34 g/L          | 30 g/L |
| Ca II 396.847     | 9.24                  | 0.90     | 1.03          | 0.67                                            | 0.95                                               | 0.95            | 0.65   |
| Ca I 422.673      | 2.93                  | 0.99     | 0.96          | 0.70                                            | 1.26                                               | 1.29            | LR     |
| Cd II 214.438     | 14.77                 | 1.57     | 1.04          | 1.07                                            | 1.85                                               | 0.91            | 0.67   |
| Cd II 226.502     | 14.46                 | 1.40     | 1.03          | 0.98                                            | 1.65                                               | 0.90            | 0.68   |
| Cd I 228.802      | 5.42                  | 1.31     | 1.02          | 0.98                                            | 1.44                                               | 0.97            | 0.79   |
| Cd I 361.051      | 7.38                  | 1.08     | 1.04          | 0.81                                            | 1.15                                               | 0.96            | 0.74   |
| Cl I 134.724      | 9.20                  | 1.77     | 0.99          | 1.20                                            | 2.03                                               | 0.83            | ND     |
| Cl I 135.165      | 9.28                  | 2.59     | 1.04          | 2.16                                            | 3.21                                               | 0.88            | ND     |
| Cl I 136.345      | 9.20                  | 1.75     | 1.00          | 1.12                                            | 1.92                                               | 0.89            | ND     |
| Co II 228.616     | 13.72                 | 1.21     | 1.02          | 0.85                                            | 1.40                                               | 0.89            | 0.65   |
| Co II 230.786     | 13.75                 | 1.19     | 1.02          | 0.85                                            | 1.40                                               | 0.90            | 0.65   |
| Co II 238.892     | 13.48                 | 1.15     | 1.01          | 0.82                                            | 1.34                                               | 0.89            | 0.63   |
| Cr II 205.552     | 12.80                 | 1.20     | 1.03          | 0.86                                            | 1.36                                               | 0.95            | 0.67   |
| Cr II 283.563     | 12.69                 | 1.14     | 1.03          | 0.83                                            | 1.32                                               | 0.94            | 0.67   |
| Cr II 284.325     | 12.65                 | 1.13     | 1.02          | 0.83                                            | 1.31                                               | 0.93            | 0.66   |
| Cr II 284.984     | 12.62                 | 1.15     | 1.04          | 0.81                                            | 1.27                                               | 0.94            | 0.66   |
| Cu II 219.226     | 16.22                 | 1.49     | 1.03          | 1.01                                            | 1.84                                               | 0.89            | 0.63   |
| Cu I 219.958      | 7.02                  | 1.24     | 1.00          | 0.90                                            | 1.40                                               | 0.94            | 0.72   |
| Cu II 224.7       | 15.96                 | 1.24     | 1.01          | 0.83                                            | 1.48                                               | 0.88            | 0.64   |
| Cu I 324.754      | 3.82                  | 0.93     | 1.02          | 0.74                                            | 1.02                                               | 1.01            | 0.75   |
| Cu I 327.396      | 3.79                  | 0.92     | 1.01          | 0.75                                            | 1.04                                               | 1.02            | 0.77   |
| Fe II 238.204     | 13.11                 | 1.20     | 1.01          | 0.86                                            | 1.39                                               | 0.85            | 0.65   |
| Fe II 239.562     | 13.12                 | 1.20     | 1.01          | 0.86                                            | 1.39                                               | 0.85            | 0.65   |
| Fe II 241.331     | 13.16                 | 1.18     | 1.01          | 0.85                                            | 1.38                                               | 0.85            | 0.65   |
| Fe II 244.451     | 15.56                 | 1.34     | 1.00          | 0.92                                            | 1.69                                               | 0.84            | 0.63   |
| Fe II 259.941     | 12.67                 | 1.11     | 1.00          | 0.81                                            | 1.27                                               | 0.83            | 0.64   |
| Fe II 261.187     | 12.70                 | 1.11     | 1.01          | 0.81                                            | 1.28                                               | 0.83            | 0.64   |
| Fe II 262.567     | 12.67                 | 1.19     | 1.01          | 0.84                                            | 1.39                                               | 0.85            | 0.64   |
| Fe II 262.829     | 12.74                 | 1.12     | 1.00          | 0.82                                            | 1.29                                               | 0.83            | 0.64   |
| Fe I 373.486      | 4.18                  | 0.96     | 1.04          | 0.76                                            | 1.13                                               | 0.96            | 0.83   |
| Hg I 184.95       | 6.70                  | 1.45     | 1.00          | 1.16                                            | 1.79                                               | 0.98            | 0.85   |
| Hg II 194.227     | 16.82                 | 1.41     | 1.01          | 1.05                                            | 1.77                                               | 0.91            | 0.77   |
| Hg I 253.652      | 4.89                  | 0.97     | 0.99          | 0.84                                            | 1.12                                               | 0.99            | 0.83   |
| Hg I 435.835      | 7.73                  | 1.20     | 0.99          | LR                                              | 1.43                                               | 0.89            | 0.75   |
| I I 142.549       | 8.70                  | 1.70     | 1.06          | LR                                              | LR                                                 | ND              | 0.87   |
| I I 161.76        | 7.66                  | LR       | 1.04          | LR                                              | LR                                                 | ND              | LR     |
| I I 178.276       | 6.95                  | 1.69     | 1.05          | LR                                              | 2.07                                               | ND              | 0.83   |
| I I 179.909       | 7.83                  | LR       | 1.06          | LR                                              | LR                                                 | ND              | LR     |
| I I 183.038       | 6.77                  | 1.52     | 1.04          | 1.20                                            | 1.86                                               | ND              | 0.76   |
| K I 766.491       | 1.62                  | 1.08     | 0.95          | ND                                              | ND                                                 | ND              | ND     |
| Mg II 279.079     | 16.51                 | 1.38     | 0.97          | 0.87                                            | 1.79                                               | 0.85            | 0.59   |
| Mg II 279.553     | 12.08                 | 1.16     | 1.03          | 0.84                                            | 1.35                                               | 0.95            | 0.62   |

| Emission line, nm   | Total Line Energy, eV | Methanol | Phenylalanine | CO <sub>2</sub> added to the aerosol gas stream | CO <sub>2</sub> added to the intermediate gas flow | Br <sub>2</sub> | NaCl   |
|---------------------|-----------------------|----------|---------------|-------------------------------------------------|----------------------------------------------------|-----------------|--------|
|                     |                       | 10 %     | 8 g/L C       | 15 sccm                                         | 15 sccm                                            | 34 g/L          | 30 g/L |
| Mg II 280.27        | 12.07                 | 1.14     | 1.00          | 0.84                                            | 1.35                                               | 0.95            | 0.61   |
| Mg I 285.213        | 4.35                  | 1.00     | 0.96          | 0.73                                            | 1.28                                               | 0.95            | 0.79   |
| Mn II 257.611       | 12.25                 | 1.07     | 0.99          | 0.80                                            | 1.28                                               | 0.92            | 0.64   |
| Mn II 259.373       | 12.21                 | 1.07     | 0.99          | 0.80                                            | 1.28                                               | 0.91            | 0.64   |
| Mn II 260.569       | 12.19                 | 1.08     | 1.00          | 0.79                                            | 1.26                                               | 0.92            | 0.64   |
| Mn II 294.921       | 12.81                 | 1.15     | 1.02          | 0.86                                            | 1.36                                               | 0.92            | 0.64   |
| Mn I 403.076        | 3.08                  | 0.75     | 0.98          | 0.58                                            | 0.95                                               | 1.06            | 0.78   |
| Mo II 202.03        | 13.22                 | 1.21     | 1.05          | 0.87                                            | 1.30                                               | 0.94            | 0.71   |
| Mo II 203.844       | 13.17                 | 1.21     | 1.04          | LR                                              | 1.33                                               | 0.94            | 0.71   |
| Mo II 204.598       | 13.15                 | 1.19     | 1.05          | 0.86                                            | 1.30                                               | 0.94            | 0.71   |
| Mo II 281.615       | 13.16                 | 1.15     | 1.04          | 0.83                                            | 1.27                                               | 0.93            | 0.70   |
| Na I 330.237        | 3.75                  | 1.17     | 0.92          | ND                                              | ND                                                 | ND              | ND     |
| Na I 330.298        | 3.75                  | 1.09     | 0.88          | ND                                              | ND                                                 | ND              | ND     |
| Na I 588.995        | 2.10                  | 0.86     | 0.93          | ND                                              | ND                                                 | ND              | ND     |
| Na I 589.592        | 2.10                  | 0.86     | 0.92          | ND                                              | ND                                                 | ND              | ND     |
| Ni II 221.648       | 14.27                 | 1.31     | 1.03          | 0.91                                            | 1.55                                               | 0.89            | 0.65   |
| Ni II 227.021       | 14.26                 | 1.29     | 1.02          | 0.90                                            | 1.52                                               | 0.88            | 0.64   |
| Ni II 231.604       | 14.03                 | 1.25     | 1.02          | 0.88                                            | 1.47                                               | 0.89            | 0.64   |
| Ni I 232.003        | 5.34                  | 1.11     | 0.99          | 0.83                                            | 1.27                                               | 0.96            | 0.75   |
| Ni I 300.249        | 4.15                  | 0.96     | 1.01          | 0.76                                            | 1.10                                               | 0.98            | 0.77   |
| Ni I 341.476        | 3.66                  | 0.88     | 1.02          | 0.71                                            | 1.00                                               | 1.02            | 0.82   |
| P I 138.147         | 8.97                  | 2.00     | 1.03          | 1.65                                            | 2.16                                               | 1.13            | 0.88   |
| P I 168.599         | 8.76                  | 2.14     | 1.05          | LR                                              | LR                                                 | LR              | LR     |
| P I 169.403         | 8.73                  | 2.08     | 1.05          | 1.71                                            | 2.21                                               | 1.13            | 0.81   |
| P I 177.495         | 6.99                  | 1.89     | 1.04          | 1.56                                            | 2.00                                               | 1.13            | 0.86   |
| P I 178.287         | 6.95                  | 1.87     | 1.03          | LR                                              | 2.01                                               | 1.13            | 0.86   |
| P I 213.618         | 7.21                  | 2.09     | 1.03          | 1.63                                            | 2.20                                               | 1.14            | 0.86   |
| P I 214.914         | 7.18                  | 2.11     | 1.03          | 1.65                                            | 2.20                                               | 1.14            | 0.86   |
| Pb II 220.353       | 14.79                 | 1.29     | 0.99          | 0.88                                            | 1.63                                               | 0.91            | 0.65   |
| Pb I 283.305        | 4.38                  | 0.97     | 0.97          | 0.77                                            | 1.16                                               | 1.02            | 0.76   |
| Pb I 405.778        | 4.38                  | 0.99     | 0.99          | 0.81                                            | 1.18                                               | 1.07            | 0.81   |
| S I 142.503         | 8.70                  | 1.44     | 0.97          | LR                                              | LR                                                 | 1.17            | 0.93   |
| S I 180.731         | 6.86                  | 1.59     | 0.97          | 1.18                                            | LR                                                 | 1.18            | 0.94   |
| S I 182.034         | 6.86                  | 1.64     | 0.98          | 1.17                                            | 1.67                                               | 1.19            | 0.91   |
| Sb I 187.115        | 6.63                  | LR       | 1.00          | LR                                              | LR                                                 | 0.98            | 0.77   |
| Sb I 206.833        | 5.99                  | 1.24     | 1.00          | LR                                              | LR                                                 | LR              | LR     |
| Sb I 217.581        | 5.70                  | 1.18     | 1.00          | 0.92                                            | 1.32                                               | 0.98            | 0.78   |
| Sc II 256.023       | 11.41                 | ND       | ND            | 1.09                                            | 1.07                                               | ND              | ND     |
| Sc I and II 335.373 | -                     | ND       | ND            | 1.04                                            | 1.02                                               | ND              | ND     |
| Sc II 355.855       | 10.05                 | ND       | ND            | 1.05                                            | 1.02                                               | ND              | ND     |
| Sc II 361.384       | 10.01                 | ND       | ND            | 1.06                                            | 1.03                                               | ND              | ND     |
| Sc II 364.279       | 9.96                  | ND       | ND            | 1.07                                            | 1.05                                               | ND              | ND     |

| Emission line, nm | Total Line Energy, eV | Methanol | Phenylalanine | CO <sub>2</sub> added to the aerosol gas stream | CO <sub>2</sub> added to the intermediate gas flow | Br <sub>2</sub> | NaCl   |
|-------------------|-----------------------|----------|---------------|-------------------------------------------------|----------------------------------------------------|-----------------|--------|
|                   |                       | 10 %     | 8 g/L C       | 15 sccm                                         | 15 sccm                                            | 34 g/L          | 30 g/L |
| Sc I 390.749      | 3.17                  | ND       | ND            | 0.88                                            | 0.86                                               | ND              | ND     |
| Sc II 424.683     | 9.80                  | ND       | ND            | 1.03                                            | 0.99                                               | ND              | ND     |
| Sc II 429.477     | 10.05                 | ND       | ND            | 1.04                                            | 1.01                                               | ND              | ND     |
| Sc II 432.501     | 10.02                 | ND       | ND            | 1.06                                            | 1.03                                               | ND              | ND     |
| Sc II 437.446     | 10.01                 | ND       | ND            | 1.07                                            | 1.05                                               | ND              | ND     |
| Se I 196.09       | 6.32                  | 2.51     | 1.20          | 1.98                                            | 2.89                                               | 1.86            | 0.78   |
| Se I 203.985      | 6.32                  | 2.64     | 1.22          | 2.02                                            | 2.97                                               | 1.83            | 0.78   |
| Se I 207.479      | 5.97                  | 2.24     | 1.22          | LR                                              | 2.37                                               | 1.85            | 0.71   |
| Sr II 407.771     | 10.38                 | 0.89     | 1.02          | 0.69                                            | 0.96                                               | 0.97            | 0.66   |
| Sr II 421.552     | 10.28                 | 0.84     | 1.02          | 0.66                                            | 0.93                                               | 0.98            | 0.65   |
| Sr I 460.733      | 2.69                  | 0.96     | 0.96          | 0.68                                            | 1.19                                               | 1.26            | LR     |
| Ti II 307.864     | 10.88                 | 1.09     | 1.04          | 0.80                                            | 1.14                                               | 0.94            | 0.70   |
| Ti II 323.452     | 10.71                 | 1.05     | 1.05          | 0.77                                            | 1.10                                               | 0.93            | 0.70   |
| Ti II 334.941     | 10.58                 | 1.03     | 1.04          | 0.78                                            | 1.13                                               | 0.95            | 0.70   |
| Ti II 336.121     | 10.54                 | 1.03     | 1.04          | 0.78                                            | 1.13                                               | 0.94            | 0.70   |
| Tl II 132.171     | 15.49                 | 2.13     | 1.03          | 1.36                                            | 2.68                                               | 0.00            | 0.72   |
| Tl II 190.864     | 12.60                 | LR       | 1.02          | LR                                              | LR                                                 | LR              | LR     |
| Tl I 276.787      | 4.48                  | 1.06     | 0.95          | 0.79                                            | 1.27                                               | 1.04            | 0.81   |
| V II 292.402      | 11.38                 | 1.14     | 1.04          | 0.85                                            | 1.26                                               | 0.94            | 0.71   |
| V II 292.464      | 11.35                 | 1.13     | 1.03          | 0.84                                            | 1.25                                               | 0.95            | 0.71   |
| V II 309.311      | 11.15                 | 1.13     | 1.05          | 0.84                                            | 1.23                                               | 0.95            | 0.70   |
| V II 311.071      | 11.08                 | 1.10     | 1.05          | 0.82                                            | 1.20                                               | 0.93            | 0.70   |
| Zn II 202.548     | 15.51                 | 1.81     | 1.05          | 1.23                                            | 2.10                                               | 0.91            | 0.69   |
| Zn II 206.191     | 15.40                 | 1.78     | 1.05          | 1.21                                            | 2.04                                               | 0.91            | 0.69   |
| Zn I 213.856      | 5.80                  | 1.28     | 1.01          | 0.94                                            | 1.41                                               | 0.93            | 0.77   |
| Zn I 334.502      | 7.78                  | 1.25     | 1.00          | 0.97                                            | 1.40                                               | 0.91            | 0.72   |

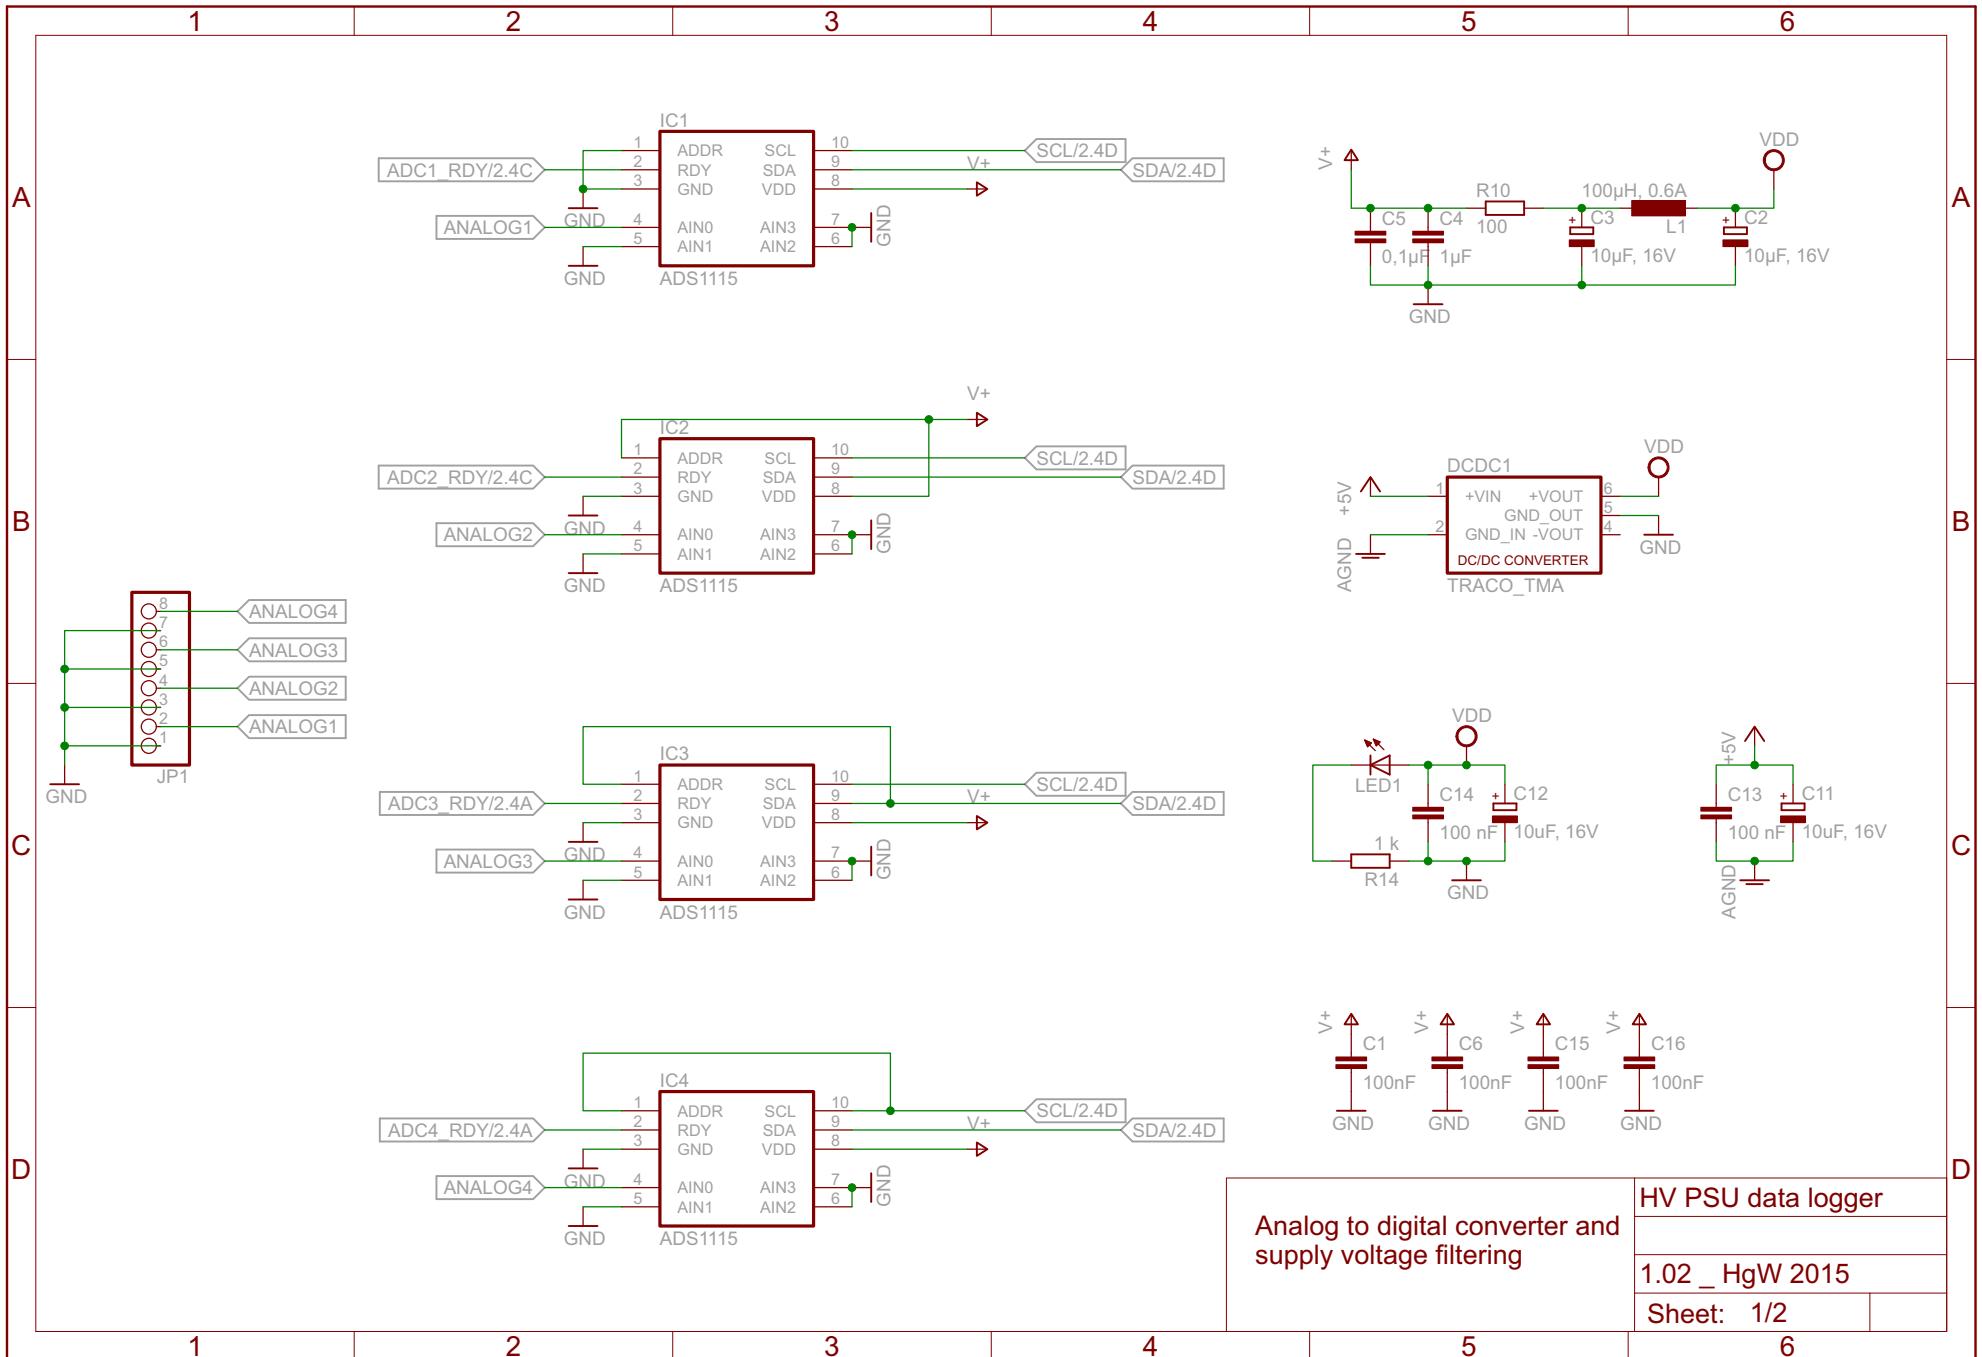

|                                                          |  |                    |  |
|----------------------------------------------------------|--|--------------------|--|
| Analog to digital converter and supply voltage filtering |  | HV PSU data logger |  |
|                                                          |  | 1.02 _ HgW 2015    |  |
|                                                          |  | Sheet: 1/2         |  |

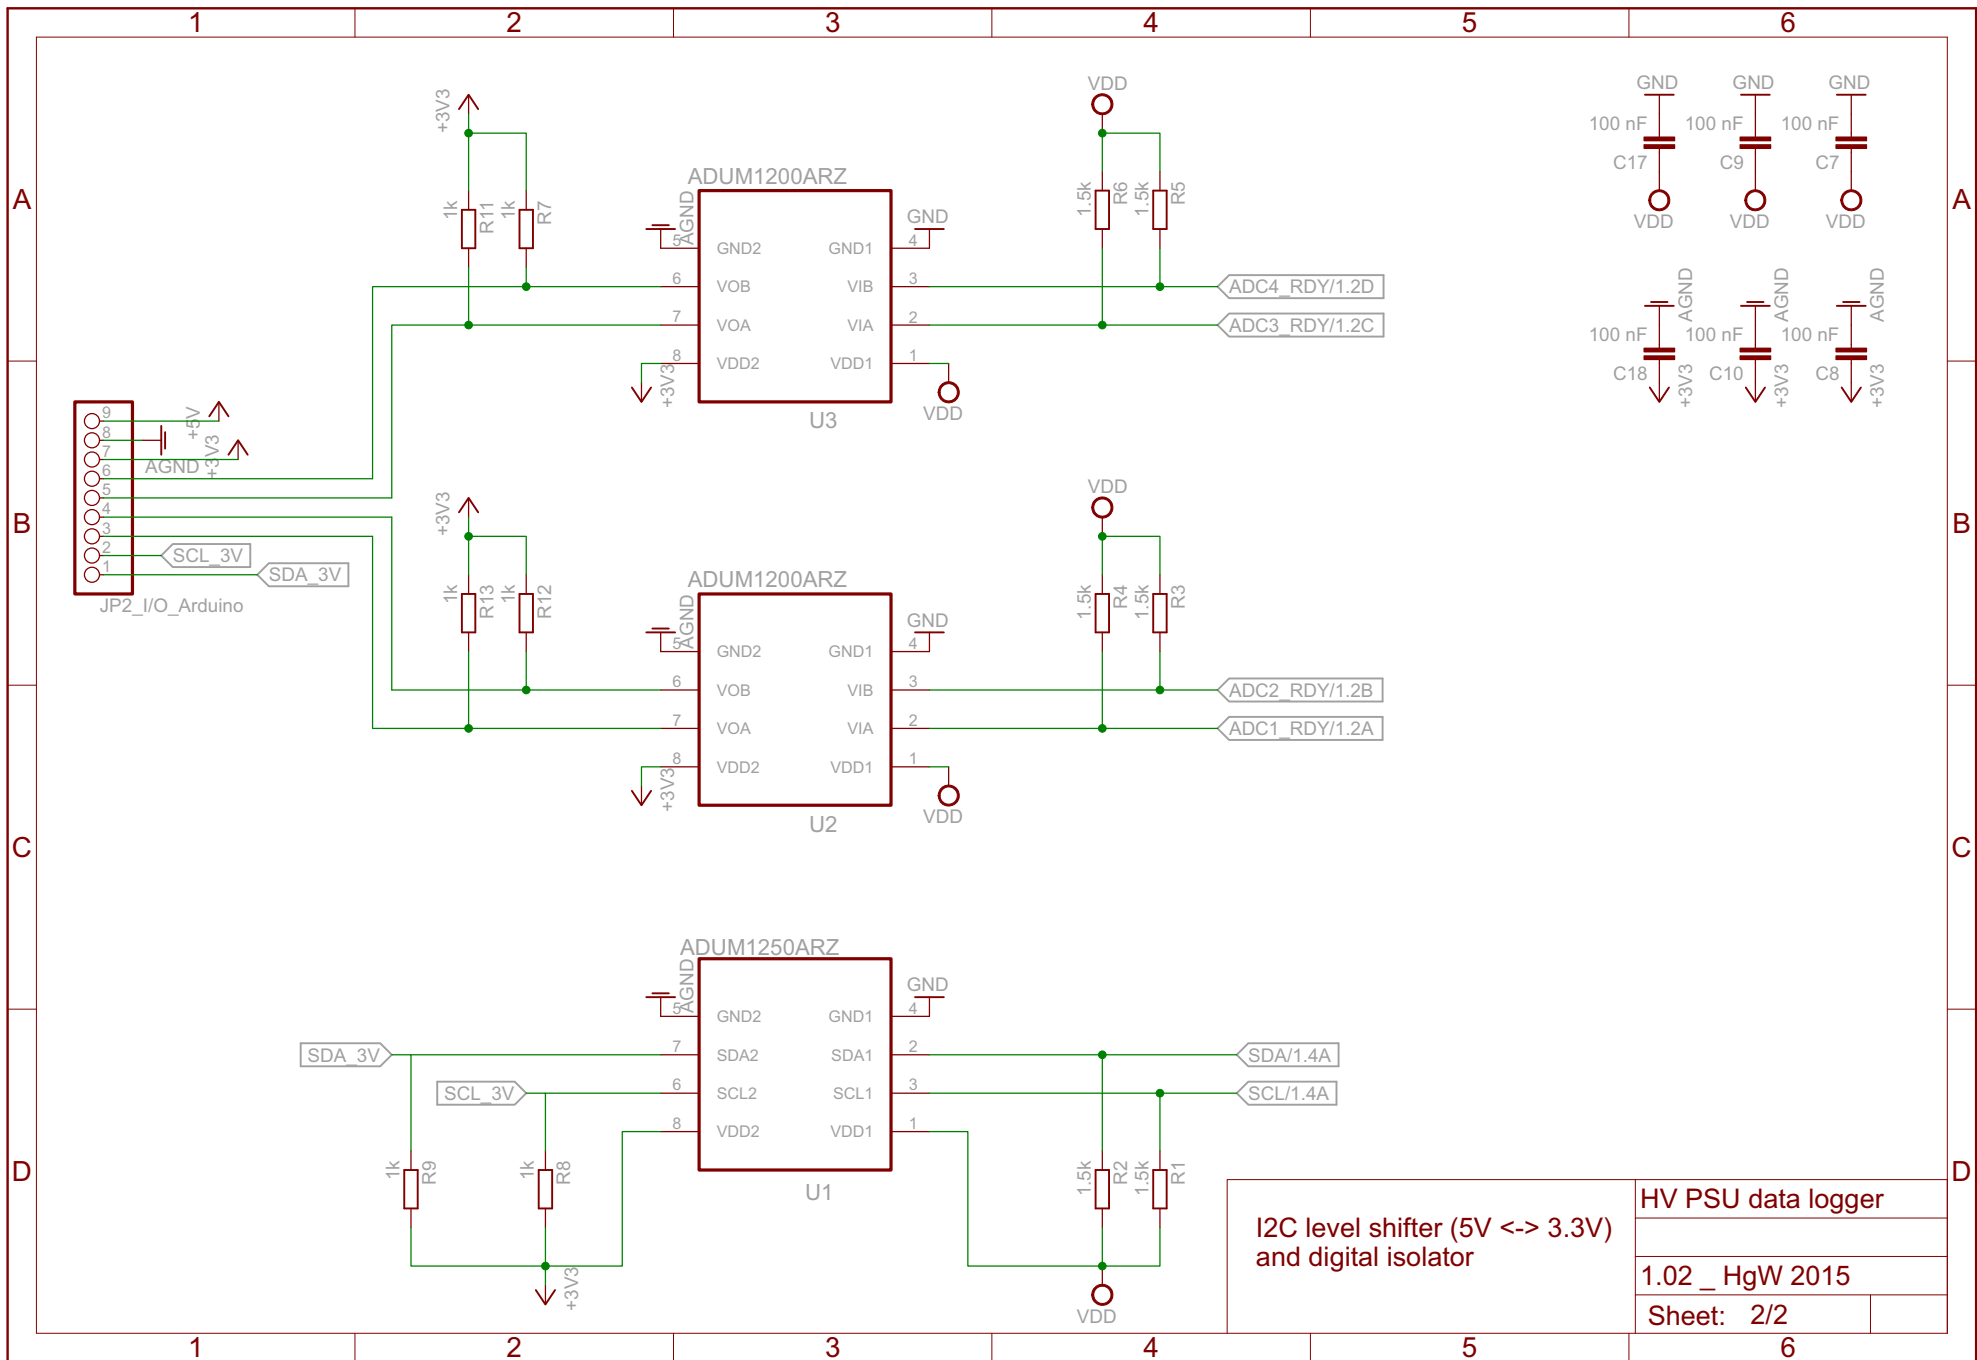

I2C level shifter (5V <-> 3.3V)  
and digital isolator

HV PSU data logger  
1.02 \_ HgW 2015  
Sheet: 2/2
